# Supplementary material for: Falldarstellung und Fallkonzeption in der Klinischen Neuropsychologie
Source: Atypon-hosted journal article supplement (doi:10.1024/1016-264x/a000390), 2024-02-23
Supplement: 1016-264X_a000390_esm1.pdf [file 1016-264X_a000390_esm1.pdf]

Textfeld für Praxisdaten / Logo

## Musterdokumentationsbogen Neuropsychologische Therapie\*

Patient / Geburtsdatum:

### Diagnostik Stufe 1 gemäß § 5 Abs. 2

Erworbene Hirnschädigung oder Hirnerkrankung nach ICD-10 oder gemäß Einschätzung von Fachärzten

Facharzt oder  
Klinik/Institution:

am (Datum)  
bzw. lt. Bericht vom

### Diagnostik Stufe 2 gemäß § 5 Abs. 3

Neuropsychologische Diagnostik durch folgenden Leistungserbringer gemäß § 6 Abs. 2:

|       |                    |                     |                                 |                   |
|-------|--------------------|---------------------|---------------------------------|-------------------|
| durch | Krankheitsanamnese | Fremdanamnese       | Störungsspezifische Exploration | sowie             |
| durch | Psychometrie/Tests | selbst durchgeführt | durch andere durchgeführt       | selbst und andere |

Krankheitswertige Störungen in folgenden Hirnleistungsfunktionen/Teilleistungsbereichen (§ 4 Abs. 1 Satz 2):

1. Lernen und Gedächtnis
2. Höhere Aufmerksamkeitsleistungen
3. Wahrnehmung, räumliche Leistungen
4. Denken, Planen und Handeln
5. Psychische Störungen bei Organischen Störungen

Neuropsychologische Diagnose/n nach ICD-10 (§ 4 Abs. 1 Satz 1):

F04, F06.6-F06.9, F07.0-F07.9 (mehrere Diagnosen sind möglich)

am (Datum)

Stationäre/rehabilitative Behandlung (§ 4 Abs. 3 Satz 1)?

ja nein

Nur angeborene Hirnfunktionsstörung (§ 4 Abs. 3 Satz 2)?

ja nein

Diagnose **fortgeschrittene** "Demenz" (§ 4 Abs. 3 Satz 3)?

ja nein (nicht mittel-/hochgradig)

Erkrankungsdauer > 5 Jahre (§ 4 Abs. 3 Satz 4)?

nein begründete Ausnahme

Basale Aufmerksamkeitsleistung gegeben?

ja nein

Einschätzung Behandlungsprognose

günstig ausreichend

Indikation für neuropsychologische Therapie  
§ 4 Abs. 3 gegeben?

ja nein

Therapieplan gemäß § 5 Abs. 4 erstellt?

nein ja, am

Klinisch-Neuropsychologischer Befund erstellt?

nein ja

Anzeige an Kostenträger nach Probatorik **vor Behandlungsbeginn** gemäß § 7 Abs. 4 am:

Anzahl durchgeführter Sitzungen (ohne Probatorik) bei Abgabe dieser Dokumentation an die KV: \_\_\_\_ / \_\_\_\_  
(Einzelsitzungen / Gruppensitzungen)

Praxisstempel

Datum, Unterschrift

\*Dokumentation gem. der RL zu Untersuchungs- und Behandlungsmethoden der vertragsärztlichen Versorgung, Anlage I, Nr. 19 - Neuropsychologische Therapie des GBA - basierend auf der Dokumentation des SAV e.V.

## Therapieplan neuropsychologische Therapie

|                          |  |           |  |
|--------------------------|--|-----------|--|
| Patient/Geburtsdatum:    |  |           |  |
| Beginn der Therapie:     |  |           |  |
| Anzahl Einzelsitzungen:  |  | Frequenz: |  |
| Anzahl Gruppensitzungen: |  | Frequenz: |  |

### Relevante ICD-10 Diagnosen (Indikation Stufe 1 u. 2)

| Häufige Diagnosen Stufe 1 ( § 5 Abs. 2) =<br>Erworbene Hirnschädigung / Hirnerkrankung | Nur diese Indikationen zur NP-Therapie der Stufe 2 ( § 4 Abs. 1)  |
|----------------------------------------------------------------------------------------|-------------------------------------------------------------------|
| I63. Hirninfarkt (HI)                                                                  | F04 organisches amnestisches Syndrom                              |
| I61. Intrazerebrale Blutung (ICB)                                                      | F06.6 organische emotional labile (asthenische) Störung           |
| I60. Subarachnoidalblutung (SAB)                                                       | F06.7 leichte kognitive Störung                                   |
| S06. SHT, Intrakranielle Verletzung                                                    | F06.8 sons.näher bezeichnete organische psychische Störung        |
| Folgen einer I69.0 SAB I69.1 ICB, I69.3 HI                                             | F06.9 nicht näher bezeichnete organische psychische Störung       |
| G93.1 Cerebrale Hypoxie                                                                | F07.0 organische Persönlichkeitsstörung                           |
| G40. Epilepsie                                                                         | F07.1 postenzephalitisches Syndrom                                |
| M36. Multiple Sklerose                                                                 | F07.2 organisches Psychosyndrom nach SHT                          |
| Tumorerkrankungen des Gehirns                                                          | F07.8 sonstige organ. Persönlichkeits- und Verhaltensstörungen    |
| Entzündungen des Gehirns                                                               | F07.9 nicht näher bez. organ. Persönlichkeits- und Verh.störungen |
| Sonstiges / andere somatische Erkrankungen:                                            | <b>Häufige Nebendiagnosen ZUSÄTZLICH zur Stufe 2</b>              |
|                                                                                        | F06.3 organisch affektive Störung                                 |
|                                                                                        | F32.- depressive Episode                                          |
|                                                                                        | F41.2 Angst und depressive Störung, gemischt                      |
|                                                                                        | F43.2 Anpassungsstörung                                           |
|                                                                                        | F45.41 chronische Schmerzstörung mit somat. u. psych. Fakt.       |
|                                                                                        | F54 Psych. u./o. Verhaltensfaktoren bei andersorts klass. Krankh. |
|                                                                                        | Z73 Probleme mit Bezug auf Schwierigkeiten b.d. Lebensführung     |
|                                                                                        | Z74.0 Probleme mit Bezug auf Pflegebedürftigkeit (Mobilität)      |
|                                                                                        | Z74.1 Notwendigkeit der Hilfestellung bei der Körperpflege        |
|                                                                                        | Z74.2 Hilfestellung im Haushalt                                   |
|                                                                                        | Z74.3 Ständige Beaufsichtigung                                    |
|                                                                                        | Z74.8 sonstige Probleme mit Bezug auf die Pflegebedürftigkeit     |

### Klinisch-Neuropsychologischer Befund

(Interpretation der Testergebnisse, Exploration, Verhaltensbeobachtung, etc.)

|                                                                               |                                                                                                                                                                                                                                                              |
|-------------------------------------------------------------------------------|--------------------------------------------------------------------------------------------------------------------------------------------------------------------------------------------------------------------------------------------------------------|
| <b>Störungen geistiger (kognitiver) Funktionen</b> (ggf. beschreiben)         | Aufmerksamkeitsleistungen (inkl. Neglect)<br>Dauerbelastbarkeit<br>Visuelle Wahrnehmung /Raumwahrnehmung<br>Räumlich-konstruktive Leistungen<br>Gedächtnis und Orientierungsfähigkeit<br>Exekutive Funktionen<br>Selbstwahrnehmung, Kritik-/Urteilsfähigkeit |
| <b>Affektive Störungen</b> (ggf. beschreiben)                                 | Anpassung/Verarbeitung<br>Emotionale Labilität (asthenisch)<br>Emotionale Belastbarkeit<br>Reizbarkeit<br>Dissoziation<br>Angst<br>Depression<br>Agitiertheit / Hypomanie / Pulssymptomatik                                                                  |
| <b>Persönlichkeitsveränderungen/Verhaltensstörungen</b><br>(ggf. beschreiben) | Antrieb<br>Impulsivität<br>Sozialverhalten                                                                                                                                                                                                                   |
| <b>Aphasie /Dysarthrie</b> (ggf. beschreiben)                                 | Sprachproduktion<br>Sprachverständnis<br>Lese-/Sinn- und Textverständnis<br>Zahlenverarbeitung und Rechnen                                                                                                                                                   |

## Beeinträchtigung in der Teilhabe (ICF-Kodierung/ Angelehnt an BAR und Mini-ICF-APP5)

| Aktivität u. Partizipation |                                                                                                                                                                                                           |
|----------------------------|-----------------------------------------------------------------------------------------------------------------------------------------------------------------------------------------------------------|
| <b>d5:</b>                 | Basale Selbstversorgung: <i>Körperpflege, An- u. Ausziehen, Essen</i>                                                                                                                                     |
| <b>d6:</b>                 | Häusliche Lebensführung: <i>Fremdhilfe, Haushaltsführung für sich u. andere</i>                                                                                                                           |
| <b>d1:</b>                 | Lernen und Wissensanwendung: <i>Konzentration, Gedächtnis, geistige Belastbarkeit, Planung, Problemlösung, Entscheidungs- u. Urteilsfähigkeit</i>                                                         |
| <b>d2:</b>                 | Allgemeine Aufgaben u. Anforderungen: <i>Belastbarkeit f. tägl. Routinen, Mehrfachaufgaben, Flexibilität, Umstellungsfähigkeit, Durchhaltefähigkeit, mit Stress /psych. Belastung umgehen</i>             |
| <b>d3:</b>                 | Kommunikation: <i>rezeptiv, expressiv, verbal, nonverbal, Verständigung, Selbstbehauptung</i>                                                                                                             |
| <b>d4:</b>                 | Mobilität: <i>Handhabung von Gegenständen, inner- u. außerhäuslich, Zurechtkommen im Straßenverkehr, Benutzung von Verkehrsmitteln, Fahreignung für Pkw</i>                                               |
| <b>d7:</b>                 | Interpersonelle Interaktionen u. soziale Beziehungen: <i>Interaktionen, soz. Leben, Familie u. Freunde, Ärgerkontrolle</i>                                                                                |
| <b>d8:</b>                 | Bedeutsame Lebensbereiche: <i>berufl. und alltäg. Leistungsfähigkeit – bezahlt- unbezahlt, Ausbildung, Kontaktfähigkeit, Gruppen- u. Teamfähigkeit, wirtschaftliche Eigenständigkeit, Umgang mit Geld</i> |
| <b>d860-899</b>            | Administrative Selbständigkeit: <i>Selbstverwaltung, Administration,</i>                                                                                                                                  |
| <b>d860-899</b>            | Sicherung Gesundheit u. Umgebung: <i>Medikamenteneinnahme</i>                                                                                                                                             |
| <b>d9:</b>                 | Gemeinschafts-, soziales u. staatsbürgerliches Leben, Erholung und Freizeit: <i>Gemeinschaftsleben, politisches Leben, Erholung u. Freizeit</i>                                                           |

### Individuelle Behandlungsziele in der neuropsychologischen Therapie

| Therapieziel                                                                               | Relevanz<br>(bitte<br>ankreuzen) | Therapiemethode | Ergänzungen | Therapieziel<br>erreicht |        |         |
|--------------------------------------------------------------------------------------------|----------------------------------|-----------------|-------------|--------------------------|--------|---------|
|                                                                                            |                                  |                 |             | nicht                    | teilw. | vollst. |
| Aufmerksamkeit / Neglect                                                                   |                                  |                 |             |                          |        |         |
| Fahreignung                                                                                |                                  |                 |             |                          |        |         |
| Umgang mit reduzierter<br>Dauerbelastbarkeit                                               |                                  |                 |             |                          |        |         |
| Visuelle Wahrnehmung,<br>Raumwahrnehmung, räumliche-<br>konstruktive Leistungen            |                                  |                 |             |                          |        |         |
| Gedächtnis                                                                                 |                                  |                 |             |                          |        |         |
| Exekutive Funktionen                                                                       |                                  |                 |             |                          |        |         |
| Sprache u. Rechnen                                                                         |                                  |                 |             |                          |        |         |
| Impulskontrolle                                                                            |                                  |                 |             |                          |        |         |
| Soziale Kompetenz                                                                          |                                  |                 |             |                          |        |         |
| Verbesserung der<br>Störungswahrnehmung und<br>Störungseinsicht                            |                                  |                 |             |                          |        |         |
| Alltagsorientierter Transfer:<br>Aufbau von Verhaltens-fertigkeiten                        |                                  |                 |             |                          |        |         |
| Modifikation ungünstiger<br>familiärer/sozialer/beruflicher<br>Umgebungsvariablen          |                                  |                 |             |                          |        |         |
| Berufliche Eingliederung: Aufbau<br>von Verhaltensfertigkeiten                             |                                  |                 |             |                          |        |         |
| Aufklärung/Infovermittlung                                                                 |                                  |                 |             |                          |        |         |
| Einbezug/Anleitung<br>Bezugspersonen                                                       |                                  |                 |             |                          |        |         |
| Krankheitsverarbeitung/Adaptation<br>, Emotional-affektive Stabilität,<br>Angstbewältigung |                                  |                 |             |                          |        |         |
| Selbstmanagement, Aufbau von<br>Selbstakzeptanz und<br>Selbstfürsorge                      |                                  |                 |             |                          |        |         |

|                             |            |                 |            |
|-----------------------------|------------|-----------------|------------|
| <b>Therapieausrichtung:</b> | Restitutiv | Kompensatorisch | Integrativ |
|-----------------------------|------------|-----------------|------------|

|                                  |  |                                         |  |
|----------------------------------|--|-----------------------------------------|--|
| <b>Kooperationsbedarf:</b>       |  |                                         |  |
| Neurologie/Psychiatrie/Hausarzt: |  | Bezugsbetreuer Wohngruppe/Arbeitsplatz: |  |
| Physio-/Ergotherapie/Logopädie:  |  | Gestalt-/Musiktherapie:                 |  |
| Gesetzlicher Betreuer:           |  | Sonstiges:                              |  |
| Arbeitgeber:                     |  |                                         |  |

#### EBM-Ziffer 30934 Erstellung eines Therapieplanes

\* Dokumentation gem. der RL zu Untersuchungs- und Behandlungsmethoden der vertragsärztlichen Versorgung, Anlage I, Nr. 19 - Neuropsychologische Therapie - basierend auf der Dokumentation des SAV e.V.

## Dokumentation von Änderungen gemäß § 9

|                         |  |
|-------------------------|--|
| Patient / Geburtsdatum: |  |
|-------------------------|--|

- a)        **Änderungen im Therapieplan** (§ 9 Abs. 1)
  
- b)        Notwendigkeit zur **Reduktion der Behandlungsdauer** (§ 9 Abs. 2)  
             (Begründung durch Indikation, neuropsychologische Symptomatik, Ergebnisse der Testdiagnostik)
  
- c)        Medizinische Notwendigkeit der **Therapie außerhalb der Praxis** (§ 9 Abs. 4)

| Datum | Dokugrund<br>(a, b, c): | Änderung/Reduktion/Therapie außerhalb der Praxis: jeweilige Begründung |
|-------|-------------------------|------------------------------------------------------------------------|
|       |                         |                                                                        |

\*Dokumentation gem. der RL zu Untersuchungs- und Behandlungsmethoden der vertragsärztlichen Versorgung, Anlage I, Nr. 19  
 Neuropsychologische Therapie des GBA - basierend auf der Dokumentation des SAV e.V.

**Dokumentation der Überschreitung des Behandlungsumfanges  
im besonderen Einzelfall nach § 9 Abs. 3**

|                         |  |
|-------------------------|--|
| Patient / Geburtsdatum: |  |
| Beginn der Therapie:    |  |

Neuropsychologische Diagnose/n nach ICD-10 (§ 4 Abs. 1 Satz 1): \_\_\_\_\_

F04, F06.6-F06.9, F07.0-F07.9 (mehrere Diagnosen sind möglich)

**Therapieziele zu Beginn der Behandlung:**

|  |                                                                                     |
|--|-------------------------------------------------------------------------------------|
|  | Aufmerksamkeit / Neglect                                                            |
|  | Fahreignung                                                                         |
|  | Umgang mit reduzierter Dauerbelastbarkeit                                           |
|  | Visuelle Wahrnehmung, Raumwahrnehmung, räumlich-konstruktive Leistungen             |
|  | Gedächtnis                                                                          |
|  | Exekutive Funktionen                                                                |
|  | Sprache u. Rechnen                                                                  |
|  | Impulskontrolle                                                                     |
|  | Soziale Kompetenz                                                                   |
|  | Verbesserung der Störungseinsicht                                                   |
|  | Alltagsorientierter Transfer: Aufbau von Verhaltensfertigkeiten                     |
|  | Modifikation ungünstiger familiärer/sozialer/beruflicher Umgebungsvariablen         |
|  | Berufliche Eingliederung: Aufbau von Verhaltensfertigkeiten                         |
|  | Aufklärung/Informationsvermittlung                                                  |
|  | Einbezug/Anleitung Bezugspersonen                                                   |
|  | Krankheitsverarbeitung/Adaptation, Emotional-affektive Stabilität, Angstbewältigung |
|  | Selbstmanagement, Aufbau von Selbstakzeptanz und Selbstfürsorge                     |

Darstellung des bisherigen Therapieverlaufes und der neuropsychologischen Verlaufsdagnostik:

Behandlungsziele, bei denen bei Fortführung der Therapie begründete Aussicht auf Erreichung besteht und die innerhalb von 60 Behandlungseinheiten (§ 7 Abs. 6 Satz 2) nicht erreicht werden können:

Überschreitung von 60 auf 80 Behandlungseinheiten daher ab der \_\_\_\_\_

Datum der Erstellung dieser Dokumentation: \_\_\_\_\_

|                                                          |
|----------------------------------------------------------|
| <b>EBM-Ziffer 30935 Bericht bei Therapieverlängerung</b> |
|----------------------------------------------------------|

\*Dokumentation gem. der RL zu Untersuchungs- und Behandlungsmethoden der vertragsärztlichen Versorgung Anlage I, Nr. 19  
Neuropsychologische Therapie des GBA - basierend auf der Dokumentation des SAV e.V.
